# Supplementary material for: Soil microbiome disruption reveals specific and general plant-bacterial relationships in three agroecosystem soils
Source: PLoS One. 2022 Nov 16;17(11):e0277529. doi: 10.1371/journal.pone.0277529 (PMC9668122; doi:10.1371/journal.pone.0277529)
Supplement: S2 Table — (XLSX) [file pone.0277529.s003.xlsx]

## Sheet: Sheet1
S2 Table: Average Plant Dry Weight (DW) Biomass and Percent Increases
Average Dry Weight (g)		Crops Tested
Soil	Treatment	Corn	Beet	Tomato	Lettuce
Organic	Unautoclaved	2.08	0.34	0.28	0.931
	Autoclaved	4.46	1.43	0.77	1.68
	% Increase	114.423	320.588	175	80.451
Conventional	Unautoclaved	1.06	0.135	0.29	0.49
	Autoclaved	4.26	0.65	0.625	1.75
	% Increase	301.887	381.481	115.517	257.143
Diseased	Unautoclaved	1.12	0.35	0.169	0.472
	Autoclaved	3.211	0.53	0.259	1.09
	% Increase	186.706	51.429	53.254	130.932
