# Supplementary material for: Soil microbiome disruption reveals specific and general plant-bacterial relationships in three agroecosystem soils
Source: PLoS One. 2022 Nov 16;17(11):e0277529. doi: 10.1371/journal.pone.0277529 (PMC9668122; doi:10.1371/journal.pone.0277529)
Supplement: S9 Table — Unclassified genera increased in abundance after disruption are listed with their lowest classification level (k: kingdom, p: phylum, etc.) (FDR: False discovery rate). Taxa listed in this S9 Table served as a control to filter out bacterial reads able to proliferate after disruption in the absence of plant growth. (XLSX) [file pone.0277529.s010.xlsx]

## Sheet: Sheet1
S9 Table: Bacterial genera observed to significantly increase in abundance in the disrupted NPCKs, compared to abundance of the same genera across undisrupted NPCKs. Unclassified genera increased in abundance after disruption are listed with their highest classification level (k: kingdom, p: phylum, etc.). Taxa listed in Table 9 served as a control to filter out bacterial reads able to proliferat…
	Basemean Disrupted	Basemean Undisrupted	P-value	FDR
Family _ Genus
(c: Parcubacteria o: unclassified) unclassified_unclassified	32.76	2.02	0.004	0.042
(o: Rhodospirillales) unclassified_unclassified	12.94	1.42	0.005	0.052
(p: BRC1 c: unclassified o: unclassified) unclassified_unclassified	4.74	0	0.009	0.078
Archangiaceae_Anaeromyxobacter	4.11	0	0.005	0.053
Bacillaceae_Fictibacillus	168.66	10.44	0.001	0.015
Burkholderiaceae_Massilia	321.81	38	0.007	0.062
Burkholderiaceae_Noviherbaspirillum	78.58	10.57	0.006	0.059
Burkholderiaceae_Rhizobacter	19.52	0.19	0.004	0.043
Caedibacteraceae_Candidatus_Nucleicultrix	5.19	0	0.001	0.015
Caulobacteraceae_Phenylobacterium	83.01	19.15	0.007	0.064
Cellvibrionaceae_Cellvibrio	112.84	4.46	0	0.001
Chitinophagaceae_Cnuella	13.46	0	0	0
Chitinophagaceae_Flaviaesturariibacter	18.52	2.23	0.01	0.085
Chthoniobacteraceae_Chthoniobacter	220.57	46.65	0.001	0.019
Cyanobacteriaceae_Annamia_HOs24	27.06	0	0.005	0.051
Desulfarculaceae_unclassified	5.52	0	0.001	0.015
Family_XVIII_unclassified	12.28	0	0	0.009
Gemmatimonadaceae_Gemmatirosa	13.09	0	0	0.003
Hymenobacteraceae_Adhaeribacter	151.18	20.55	0	0.003
Hymenobacteraceae_Pontibacter	127.99	8.95	0	0.002
Micrococcaceae_Paenarthrobacter	59.9	0.39	0	0
Micromonosporaceae_Micromonospora	459.05	10.73	0	0.001
Micropepsaceae_unclassified	29.95	4.06	0.005	0.054
Nitrosomonadaceae_Nitrosomonas	3.62	0	0.002	0.027
Opitutaceae_IMCC26134	6.06	0	0.002	0.029
Paenibacillaceae_Cohnella	19.35	0	0	0.002
Paenibacillaceae_Paenibacillus	29.09	0.21	0.002	0.022
Pedosphaeraceae_unclassified	173.34	16.43	0	0
Planococcaceae_Lysinibacillus	16.43	0.39	0.009	0.078
Planococcaceae_Paenisporosarcina	36.03	3.66	0.003	0.035
Pseudohongiellaceae_BIyi10	7.89	0.99	0.009	0.078
Rhizobiaceae_unclassified	280.32	2.35	0	0
Solibacteraceae__Paludibaculum	7.77	0	0	0.002
Sphingomonadaceae_Porphyrobacter	31.88	2.08	0.009	0.078
Streptomycetaceae_Allostreptomyces	16.13	0	0.002	0.028
Thermoactinomycetaceae_Baia	7.64	0	0.003	0.039
Thermoactinomycetaceae_unclassified	6.7	0.19	0.009	0.078
Verrucomicrobiaceae_Prosthecobacter	5.38	0.14	0.002	0.03
